# Supplementary material for: Sequential therapy for pancreatic cancer by losartan- and gemcitabine-loaded magnetic mesoporous spheres
Source: Royal Society of Chemistry journal article supplement (doi:10.1039/c9ra02180a), 2019-01-01
Supplement: c9ra02180a1.pdf [file c9ra02180a1.pdf]

## Supplementary Information

### Sequential therapy for pancreatic cancer by losartan- and gemcitabine-loaded magnetic mesoporous spheres

Yanjuan Li<sup>1</sup>, Yuxia Tang<sup>1,\*</sup>, Sui Chen<sup>1</sup>, Ying Liu<sup>1</sup>, Shouju Wang<sup>1,2</sup>, Ying Tian<sup>1</sup>,  
Chunyan Wang<sup>1</sup>, Zhaogang Teng<sup>1,2,\*</sup>, Guangming Lu<sup>1,2,\*</sup>

<sup>1</sup>Department of Medical Imaging, Jinling Hospital, School of Medicine, Nanjing University, Nanjing 210002, P.R. China.

<sup>2</sup>State Key Laboratory of Analytical Chemistry for Life Science, School of Chemistry and Chemical Engineering, Nanjing University, Nanjing 210093, P.R. China.

\*Corresponding authors, E-mail addresses: tangyuxia5@163.com (Y. Tang),  
tztg@fudan.edu.cn (Z. Teng), and cjr.luguangming@vip.163.com (G. Lu)

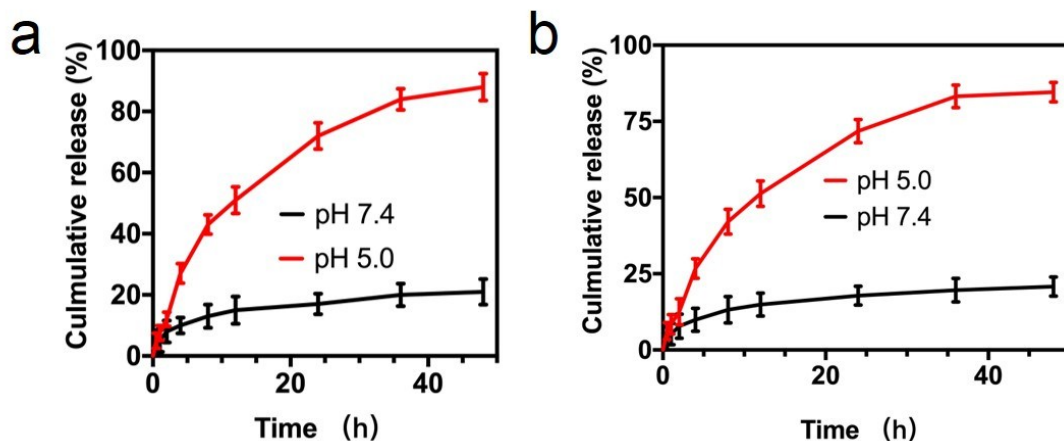

**Figure S1.** In vitro release profiles of (a) losartan from  $\text{Fe}_3\text{O}_4@\text{PMO-NH}_2\text{-Los}$  and (b) gemcitabine from  $\text{Fe}_3\text{O}_4@\text{PMO-Gem}$  at pH 7.4 and 5.0. Each experiment repeated three times.

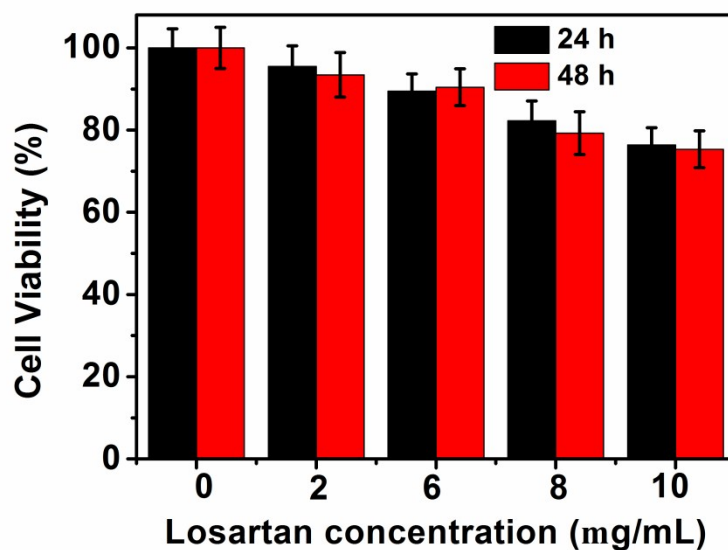

**Figure S2.** In vitro viability of pancreatic cancer DSL/6A cells incubated with  $\text{Fe}_3\text{O}_4@\text{PMO-NH}_2\text{-Los}$  for 24 h and 48 h. Each group has 5 repeat wells.

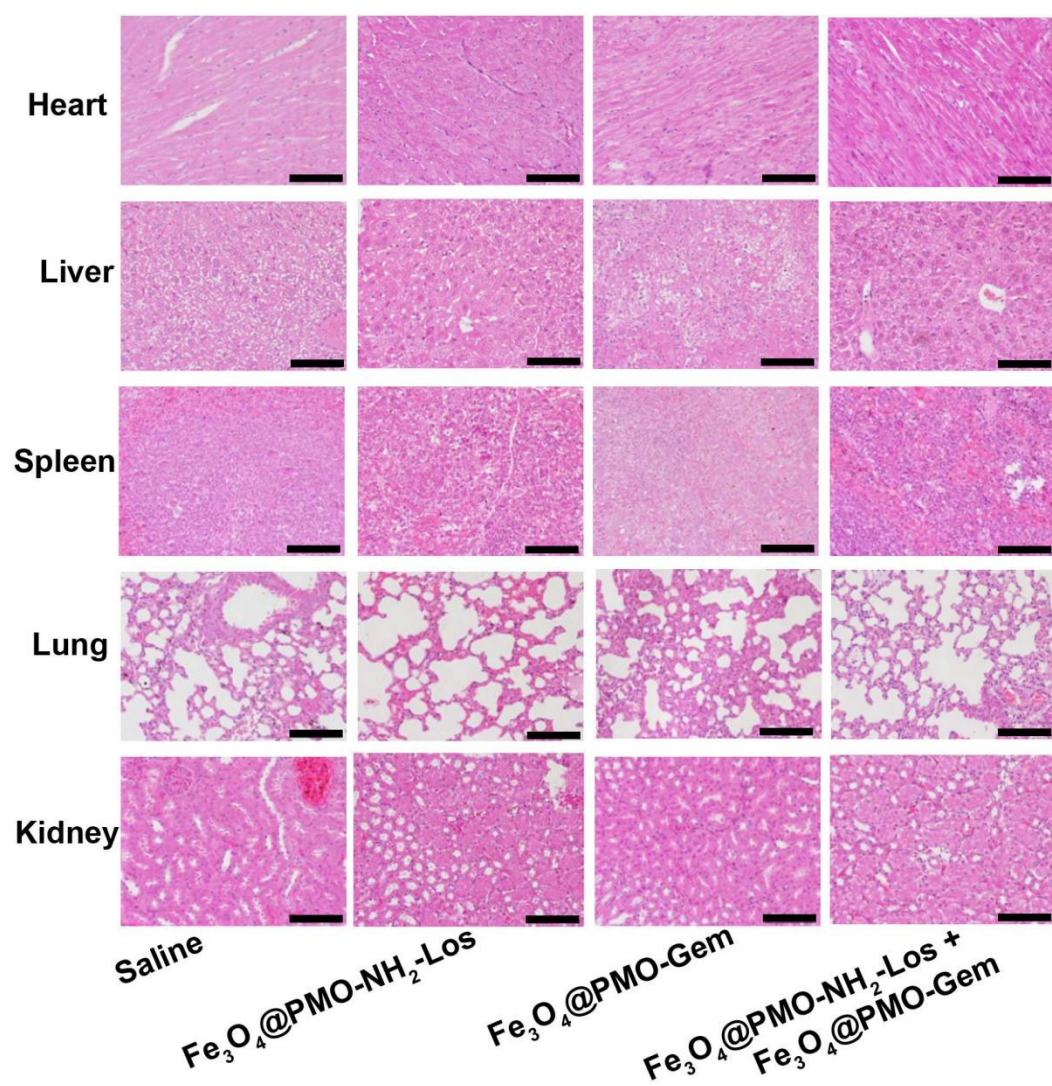

**Figure S3.** H&E staining assay of heart, liver, spleen, lung and kidney tissues after the treatment. Bar represents 20  $\mu\text{m}$ .

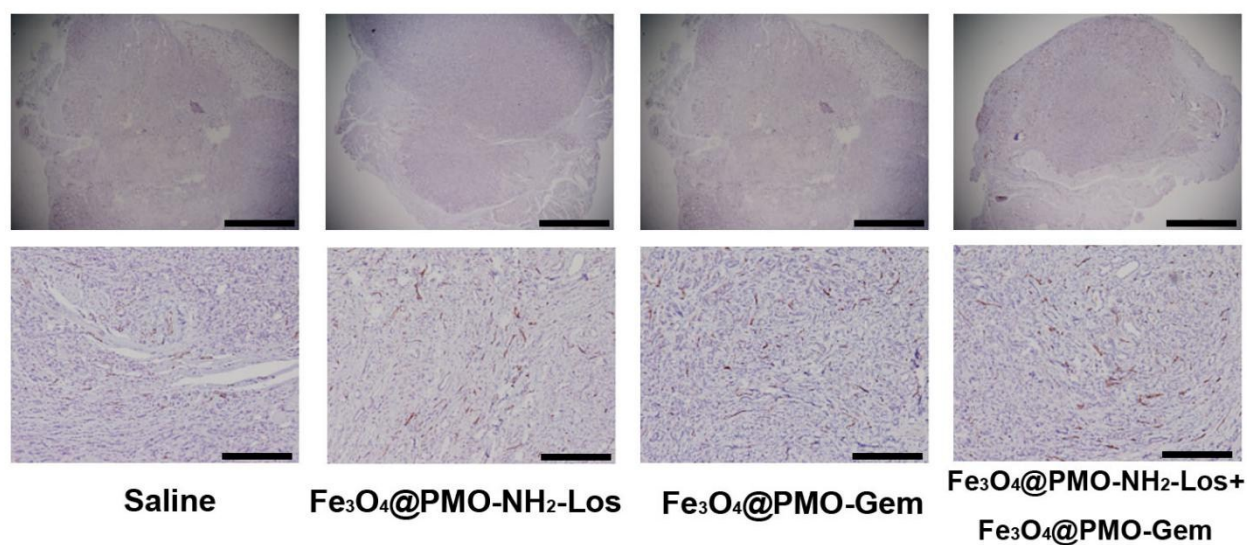

**Figure S4.** Representative images of immunohistochemistry staining of CD31 of DSL/6A tumor from different groups after the treatment at different magnifications. The upper row is magnified  $\times 20$  with scale bar 1000  $\mu\text{m}$  and the lower row is magnified  $\times 100$  with scale bar 20  $\mu\text{m}$ .

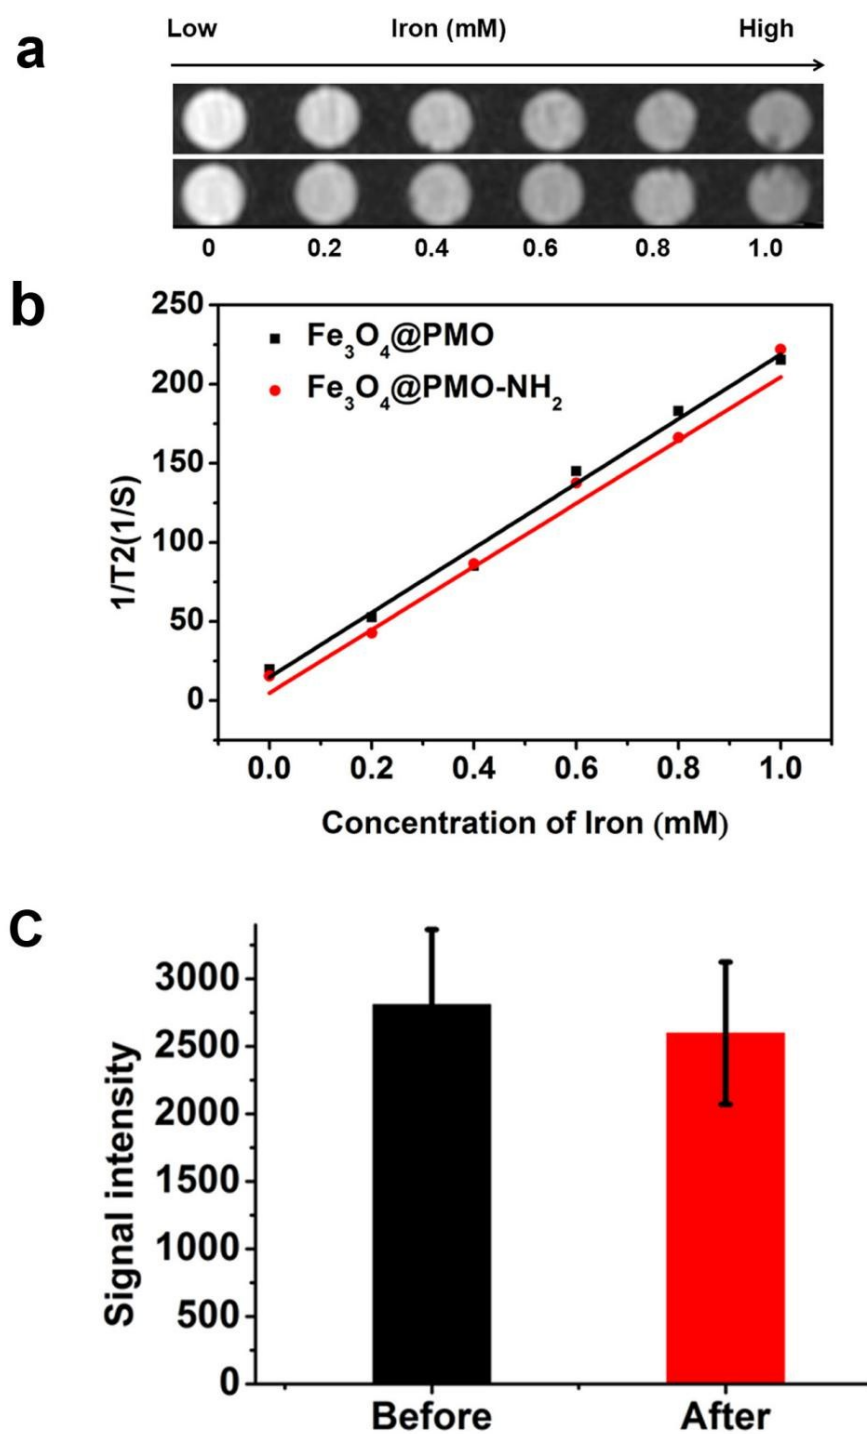

**Figure S5.** (a) T<sub>2</sub>-weighted MR images of the composite spheres of different Fe concentrations in the agarose gel. (b) Relaxation rate R<sub>2</sub> (1/T<sub>2</sub>) of Fe<sub>3</sub>O<sub>4</sub>@PMO and Fe<sub>3</sub>O<sub>4</sub>@PMO-NH<sub>2</sub> as a function of Fe concentration. (c) The signal intensity of MRI before and after the intravenously injection of Fe<sub>3</sub>O<sub>4</sub>@PMO-NH<sub>2</sub>-Los.
